# Supplementary material for: The Fungal Protein Mes1 Is Required for Morphogenesis and Virulence in the Dimorphic Phytopathogen Ustilago maydis
Source: MDPI journal article supplement (doi:10.3390/jof8080759), 2022-07-22
Supplement: s1 [file s1]

**Table S1.** *U. maydis* strains used in this study.

| Strain | Relevant genotype                                                             | Reference  |
|--------|-------------------------------------------------------------------------------|------------|
| FB1    | <i>a1 b1</i>                                                                  | [21]       |
| FB2    | <i>a2 b2</i>                                                                  | [21]       |
| AB31   | <i>a2 P<sub>crg</sub>:bW2 P<sub>crg</sub>:bE1</i>                             | [23]       |
| AB33   | <i>a2 P<sub>nar1</sub>:bW2 P<sub>nar1</sub>:bE1</i>                           | [23]       |
| UMD4   | <i>a1 b1 mes1<sup>nar</sup></i>                                               | This study |
| UMD12  | <i>a1 b1 Δmes1</i>                                                            | This study |
| UMD16  | <i>a2 b2 Δmes1</i>                                                            | This study |
| UMP71  | <i>a1 b1 fim1-gfp</i>                                                         | [40]       |
| UMD9   | <i>a2 P<sub>nar1</sub>:bW2 P<sub>nar1</sub>:bE1 Δmes1</i>                     | This study |
| UMD7   | <i>a2 P<sub>crg</sub>:bW2 P<sub>crg</sub>:bE1 mes1<sup>nar</sup></i>          | This study |
| UMD17  | <i>a2 P<sub>crg</sub>:bW2 P<sub>crg</sub>:bE1 mes1<sup>nar</sup> fim1-gfp</i> | This study |
| UMD18  | <i>a2 P<sub>crg</sub>:bW2 P<sub>crg</sub>:bE1 mes1<sup>nar</sup> myo5-gfp</i> | This study |
| UMD19  | <i>a2 P<sub>crg</sub>:bW2 P<sub>crg</sub>:bE1 mes1<sup>nar</sup> sep1-gfp</i> | This study |

**Table S2.** Primers used in this study.

|                |                                               |
|----------------|-----------------------------------------------|
| <i>mes1-2</i>  | 5'-CGGGGTACCACTCGATGATGTCACTGAAAG-3'          |
| <i>mes1-4</i>  | 5'-CGCGGATCCATCACCGAAGCTTCCAACGAA-3'          |
| <i>mes1-5</i>  | 5'-CGGGGTACCGGCAACGTGACTGGCTGGCTG-3'          |
| <i>mes1-8</i>  | 5'-CCGCTTAAGCTTGATACCACTTTTGACAGT-3'          |
| <i>mes1-9</i>  | 5'-AAGGCCTAGATGGCCGATTTGAGCAGGGCGGGGCTT-3'    |
| <i>mes1-10</i> | 5'-AAGGCCTGAGTGGCCTAGCATACGATTCACGATTGTCGC-3' |
| <i>mes1-11</i> | 5'-TCCATCGCTTCGTCTTTTGCTTCCGC-3'              |

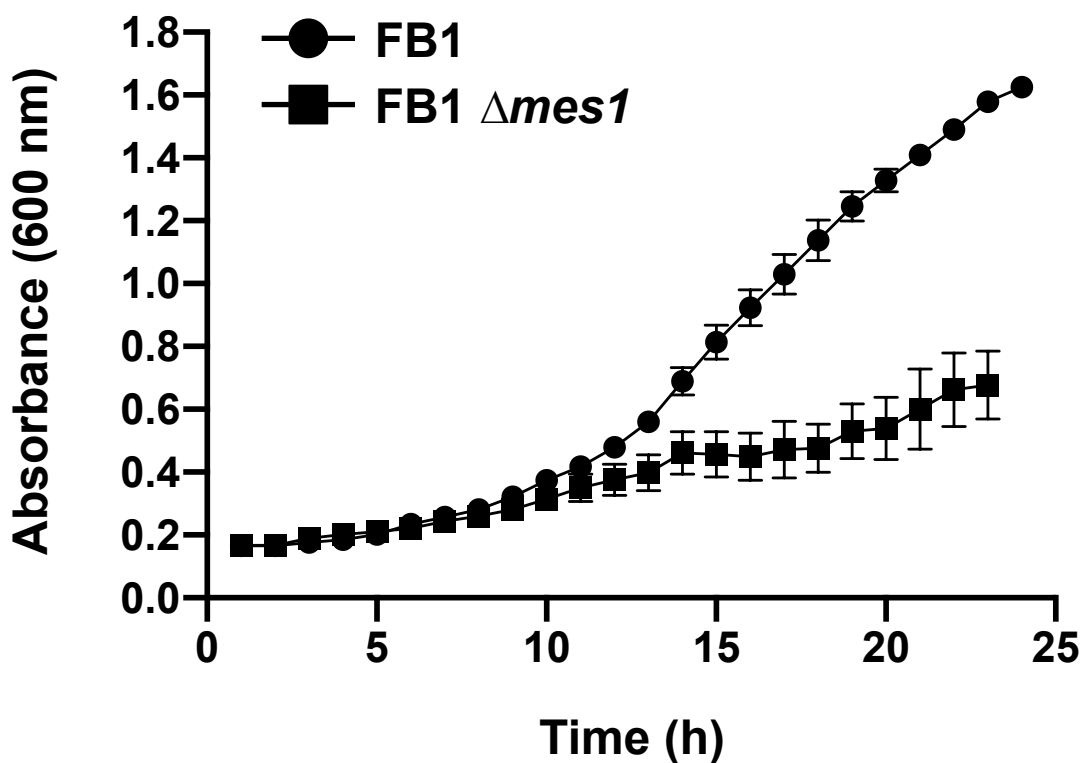

Figure S1. Growth curve of FB1 and FB1  $\Delta mes1$  strains on YPD solid media. Strains were grown in liquid media overnight and cultures were diluted to a final OD<sub>600nm</sub> of 0.1. 30  $\mu$ l were employed to inoculate YPD solid media in a 96-well plate and growth was monitored every hour for 24 h by using a plate reader as previously reported .

**FB1  $\Delta mes1$ , 24 h at 34 °C**

---

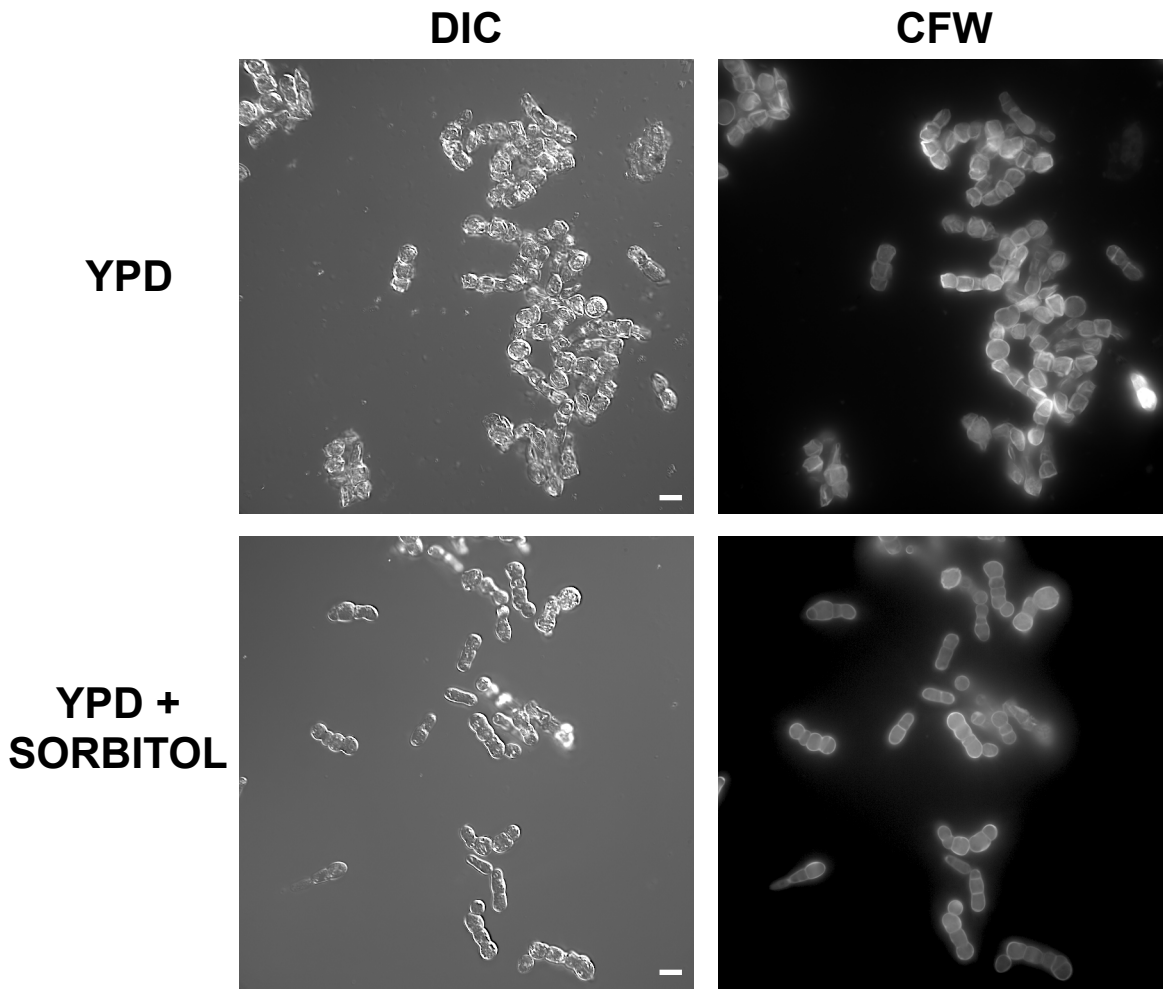

Figure S2. Supplementation of liquid media with sorbitol did not remediate the polarization defects of the  $\Delta mes1$  strain. FB1 and FB1  $\Delta mes1$  strains were grown overnight in YPD at 23 °C, diluted into fresh YPD or YPD + 1 M sorbitol and incubated at 34 °C for 24 h. Cells were stained with calcofluor and photographed under the fluorescent microscope. Bar size = 10  $\mu$ m.



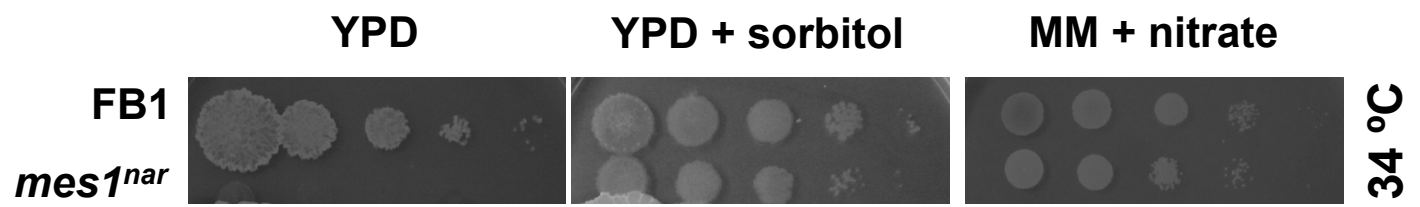

Figure S3. The conditional allele *mes1<sup>nar</sup>* recapitulates the  $\Delta mes1$  deletion phenotype. 10-fold serial dilutions of FB1 and FB1 *mes1<sup>nar</sup>* strains were spotted on YPD plates with or without 1 M sorbitol, or on plates containing glucose minimal medium with nitrate to repress (YPD) or to induce (MM+nitrate) *mes1* expression. Plates incubated at 34 °C and photographed.

## AB31, 23 °C

---

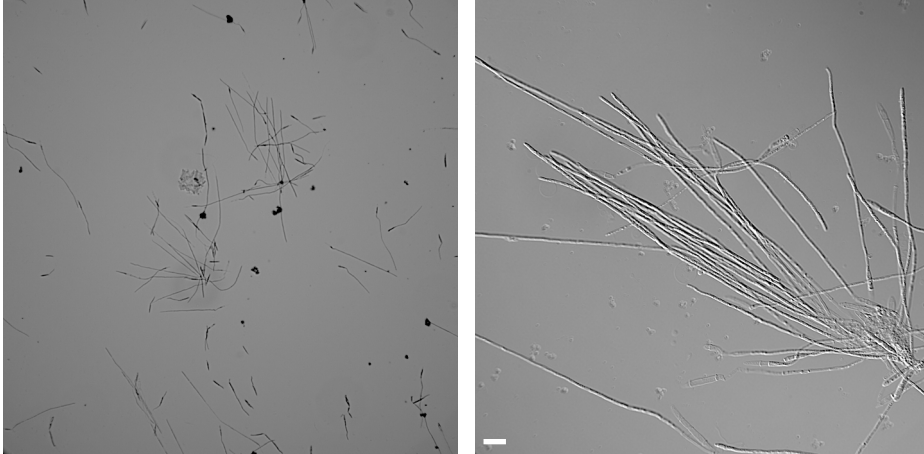

## AB31 *mes1<sup>nar</sup>* OFF, 23 °C

---

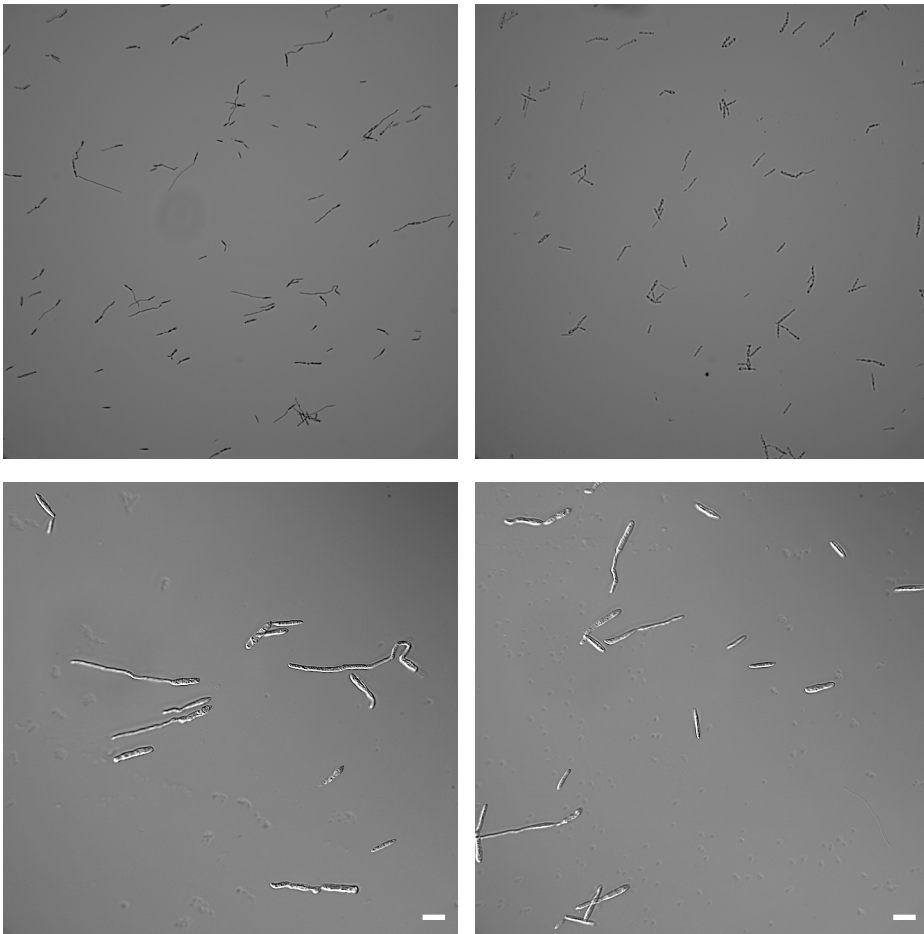

Figure S4. Lack of *mes1* hinders filamentation at 23 °C. AB31 and AB31 *mes1<sup>nar</sup>* were grown in YPD media at 23 °C. Cells were washed and incubated in CMA media overnight to induce *b*-dependent filamentation. Bar size = 10  $\mu$ m.
